# Supplementary material
Source: HighWire-hosted journal article supplement (https://bmjopengastro.bmj.com/highwire/filestream/2021/field_highwire_adjunct_files/0/bmjgast-2020-000572supp001_data_supplement.pdf)
Supplement: bmjgast-2020-000572supp001_data_supplement.pdf [file bmjgast-2020-000572supp001_data_supplement.pdf]

## Detecting non-alcoholic fatty liver disease and risk factors in health databases: accuracy and limitations of the ICD-10-AM

### Authors:

Kelly L. Hayward, Amy L. Johnson, Leigh U. Horsfall, Chris Moser, Patricia C. Valery, Elizabeth E. Powell.

### Correspondence to:

Prof. Elizabeth E. Powell

Level 5 West Wing, Translational Research Institute, 37 Kent Street, Woolloongabba QLD 4102, Australia

P: +6 1 7 3443 8015

E: e.powell@uq.edu.au

### Additional Methods

#### QHAPDC

The Queensland Hospital Admitted Patient Data Collection (QHAPDC) registry contains clinical and socio-demographic information on all hospital episodes of care for patients admitted to hospital in Queensland, Australia. The state of Queensland adopted ICD-10-AM from ICD-9-AM in the year 1999. Data relating to admitted episodes of care are coded using the current version of ICD-10-AM; Australian Classification of Health Interventions; and Australian Coding Standards, “as a means by which admitted patient activity can be reported, monitored, evaluated, planned for and researched, thereby allowing improved and objective decision-making” (Statistical Services Branch, Queensland Health. QHAPDC standard: Clinical coding. Brisbane, 2020).

#### Calculating Sensitivity, Specificity, Positive and Negative Predictive Values

Supplementary Table 1A. Measures of accuracy between ICD-10-AM codes and the medical record

| Measure                                                                                                                                   | Calculation                                      |
|-------------------------------------------------------------------------------------------------------------------------------------------|--------------------------------------------------|
| <b>Sensitivity</b><br><i>Proportion of patients who have the disease/condition that are correctly identified by the ICD-10-AM code(s)</i> | True positive / (true positive + false negative) |
| <b>Specificity</b><br><i>Proportion of patients who do not have the disease/condition that do not have the ICD-10-AM code(s)</i>          | True negative / (false positive + true negative) |
| <b>PPV</b><br><i>Proportion of encounters with ICD-10-AM code(s) that correctly identify patients with the disease/condition</i>          | True positive / (true positive + false positive) |
| <b>NPV</b><br><i>Proportion of encounters without ICD-10-AM code(s) that correctly identify patients without the disease/condition</i>    | True negative / (true negative + false negative) |

Supplementary Table 1B. Classification table cells and definitions

|                                  |                  | <b>Disease / condition<br/>(on medical record review)</b> |                |
|----------------------------------|------------------|-----------------------------------------------------------|----------------|
|                                  |                  | Present (+)                                               | Absent (-)     |
| <b>Test<br/>(ICD-10-AM code)</b> | Code present (+) | True Positive                                             | False Positive |
|                                  | Code absent (-)  | False Negative                                            | True Negative  |
